# Supplementary material for: Radiomic-Based Biomarkers for the Evaluation of Prosthetic Heart Valve Infective Endocarditis in Non-Attenuation Correction [18F]FDG PET/CT Images
Source: MDPI journal article supplement (doi:10.3390/app14062296), 2024-03-08
Supplement: s1 [file s1]

Archive with 1 entries (1 files):
- applsci-2879918-supplementary.pdf
