# Supplementary material for: Radiomic-Based Biomarkers for the Evaluation of Prosthetic Heart Valve Infective Endocarditis in Non-Attenuation Correction [18F]FDG PET/CT Images
Source: MDPI journal article supplement (doi:10.3390/app14062296), 2024-03-08
Supplement: s1 [file s1 › applsci-2879918-supplementary.pdf]

## Supplementary material

**Table S1.** Case-by-case tabulation of the individual subjects and their clinical outcome.

| Image study | PVE | Diagnosis                                         | Valve  | Sex | Age | Race and ethnicity |
|-------------|-----|---------------------------------------------------|--------|-----|-----|--------------------|
| S01         | No  | Discarded PVE                                     | Mitral | M   | 80  | Caucasian European |
| S02         | Yes | Confirmed PVE                                     | Aortic | M   | 87  | Caucasian European |
| S03         | No  | Resolved PVE                                      | Aortic | M   | 87  | Caucasian European |
| S04         | No  | Discarded PVE                                     | Mitral | M   | 80  | Caucasian European |
| S05         | No  | Discarded PVE                                     | Mitral | F   | 88  | Caucasian European |
| S06         | No  | Discarded PVE                                     | Mitral | F   | 81  | Caucasian European |
| S07         | Yes | Confirmed PVE                                     | Aortic | M   | 53  | Caucasian European |
| S08         | Yes | Confirmed PVE                                     | Aortic | M   | 53  | Caucasian European |
| S09         | No  | Discarded PVE                                     | Mitral | M   | 80  | Caucasian European |
| S10         | Yes | Confirmed PVE                                     | Aortic | M   | 86  | Caucasian European |
| S11         | No  | Resolved PVE                                      | Mitral | M   | 79  | Caucasian European |
| S12         | No  | Discarded PVE                                     | Aortic | M   | 73  | Caucasian European |
| S13         | Yes | Confirmed PVE                                     | Mitral | M   | 53  | Caucasian European |
| S14         | No  | Discarded PVE                                     | Mitral | M   | 85  | Caucasian European |
| S15         | Yes | Confirmed PVE                                     | Mitral | F   | 73  | Caucasian European |
| S16         | Yes | Subacute infective endocarditis (S. Galloliticus) | Mitral | M   | 78  | Caucasian European |
| S17         | Yes | Confirmed PVE                                     | Mitral | M   | 85  | Caucasian European |
| S18         | No  | High suspicion of endocarditis                    | Mitral | M   | 86  | Caucasian European |
| S19         | No  | Discarded PVE                                     | Aortic | M   | 83  | Caucasian European |
| S20         | Yes | Confirmed PVE                                     | Aortic | M   | 79  | Caucasian European |

**Table S2.** Non-parametric Spearman correlations ( $\rho$ ) were calculated between the remaining radiomic features post-univariate and reproducibility analyses, with highly correlated features ( $\rho \geq 0.9$ ) discarded to mitigate multicollinearity issues.

|                                  |        |        |        |        |        |        |        |        |
|----------------------------------|--------|--------|--------|--------|--------|--------|--------|--------|
| firstorder Entropy               | 1      | -0.949 | 0.997  | 0.76   | -0.825 | -0.991 | 0.844  | 0.62   |
| firstorder Kurtosis              | -0.949 | 1      | -0.942 | -0.632 | 0.799  | 0.962  | -0.724 | -0.518 |
| glcm SumEntropy                  | 0.997  | -0.942 | 1      | 0.773  | -0.822 | -0.99  | 0.858  | 0.631  |
| gldm DependenceEntropy           | 0.76   | -0.632 | 0.773  | 1      | -0.64  | -0.734 | 0.898  | 0.744  |
| glrlm GrayLevelNonUniformity     | -0.825 | 0.799  | -0.822 | -0.64  | 1      | 0.833  | -0.741 | -0.815 |
| glrlm GrayLevelNonUniformityNorm | -0.991 | 0.962  | -0.99  | -0.734 | 0.833  | 1      | -0.82  | -0.608 |
| glrlm RunEntropy                 | 0.844  | -0.724 | 0.858  | 0.898  | -0.741 | -0.82  | 1      | 0.8    |
| ngtdm Coarseness                 | 0.62   | -0.518 | 0.631  | 0.744  | -0.815 | -0.608 | 0.8    | 1      |

firstorder Entropy  
firstorder Kurtosis  
glcm SumEntropy  
gldm DependenceEntropy  
glrlm GrayLevelNonUniformity  
glrlm GrayLevelNonUniformityNorm  
glrlm RunEntropy  
ngtdm Coarseness

**Table S3.** Hyperparameters of the ML models for Confirmed PVE and Discarded PVE classification.

| Method              | Hyperparameters                                                                                                                                                                           |
|---------------------|-------------------------------------------------------------------------------------------------------------------------------------------------------------------------------------------|
| Logistic regression | Regularization type: LASSO; Strength C=1; Balanced class distribution: activated                                                                                                          |
| Neural network      | Neurons in hidden layers: 10; Activation: ReLu; Solver: Adam; Regularization a=0.0001; Maximal number of iterations: 200; Replicable training: activated.                                 |
| kNN                 | Number of neighbors: 5; Metric: Euclidean; Weight: Uniform.                                                                                                                               |
| Naive bayes         | -                                                                                                                                                                                         |
| SVM linear          | Cost (C): 1,00; Regression loss epsilon, 0,10; Kernel: linear; Numerical tolerance: 0.0010; Iteration limit: 100.                                                                         |
| Random forest       | Number of trees: 10; Replicable training: activated; Balance class distribution: activated; Do not split subsets smaller than: 5.                                                         |
| Gradient boosting   | Number of trees: 10; Learning rate: 0.100; Replicable training: activated; Limit depth of individual trees: 3; Do not split subsets smaller than: 2; Fraction of training instances: 0.75 |
| Decision tree       | Induce binary tree: Activated; Min. number of instances in leaves: 2; Do not split subsets smaller than: 5; Limit the maximal tree depth to: 100; Stop when majority reaches [%]: 95.     |

**Table S4.** Performances of ML models based on all the extracted radiomic features for Confirmed PVE and Discarded PVE classification.

| Method              | AUC    | Accuracy | F1-score | Precision | Recall | Specificity |
|---------------------|--------|----------|----------|-----------|--------|-------------|
| Naive Bayes         | 0.869* | 0.900*   | 0.900*   | 0.900*    | 0.900* | 0.898*      |
| Logistic Regression | 0.818* | 0.700    | 0.700    | 0.714     | 0.700  | 0.714       |
| Decision tree       | 0.793* | 0.750    | 0.751*   | 0.755*    | 0.750  | 0.755*      |
| Neural Network      | 0.788* | 0.700    | 0.700    | 0.714     | 0.700  | 0.714       |
| Random Forest       | 0.778* | 0.750    | 0.748    | 0.750     | 0.750  | 0.735       |
| kNN                 | 0.778* | 0.800*   | 0.800*   | 0.800*    | 0.800* | 0.796*      |
| Gradient Boosting   | 0.768* | 0.750    | 0.748    | 0.750     | 0.750  | 0.735       |
| SVM linear          | 0.606  | 0.650    | 0.647    | 0.675     | 0.650  | 0.673       |

\*Acceptable performance (&gt;0.75)
